# Supplementary material for: Identification of Risk Factors for Suicidal Ideation and Attempt Based on Machine Learning Algorithms: A Longitudinal Survey in Korea (2007–2019)
Source: MDPI journal article supplement (doi:10.3390/ijerph182312772), 2021-12-03
Supplement: s1 [file s1]

## Supplementary Materials

**Table S1:** Important features and risk variable score in yearly dataset condition (2007 and 2008).

| Rank | DV                  | Variable | Variable description                     | Risk variable score | DV                  | Variable | Variable description                                 | Risk variable score |
|------|---------------------|----------|------------------------------------------|---------------------|---------------------|----------|------------------------------------------------------|---------------------|
| 1    | BP6_10 <sup>1</sup> | ainc     | Average monthly income                   | 0.2020              | BP6_31 <sup>2</sup> | age      | Age of participant                                   | 0.2372              |
| 2    |                     | age      | Age of participant                       | 0.1869              |                     | ainc     | Average monthly income                               | 0.1562              |
| 3    |                     | BD2      | Drinking age                             | 0.1205              |                     | BD2      | Drinking age                                         | 0.1337              |
| 4    |                     | LQ_VAS   | EuroQoL: total score                     | 0.0800              |                     | LQ4_21   | Activity restriction: obesity                        | 0.0677              |
| 5    |                     | BP8      | Average sleep time per day               | 0.0611              |                     | LQ4_00   | Whether activity is restricted                       | 0.0491              |
| 6    |                     | educ     | Education level                          | 0.0529              |                     | educ     | Education level                                      | 0.0387              |
| 7    |                     | BO1      | Subjective body type recognition         | 0.0383              |                     | LQ_VAS   | EuroQoL: total score                                 | 0.0329              |
| 8    |                     | D_1_1    | Subjective health status                 | 0.0316              |                     | incm     | Personal income                                      | 0.0295              |
| 9    |                     | BP1      | Awareness of usual stress                | 0.0285              |                     | LQ4_06   | Activity restriction: stroke                         | 0.0294              |
| 10   |                     | BO1_1    | Weight change in past 1 year             | 0.0264              |                     | LQ4_13   | Activity restriction: hearing problem                | 0.0222              |
| 11   |                     | incm     | Personal income                          | 0.0256              |                     | LQ_4EQL  | EuroQoL: pain/discomfort                             | 0.0207              |
| 12   |                     | house    | Home ownership                           | 0.0243              |                     | BO1_1    | Weight change in past 1 year                         | 0.0195              |
| 13   |                     | EC1_1    | Economic activity                        | 0.0234              |                     | ho_incm  | Household income                                     | 0.0195              |
| 14   |                     | ho_incm  | Household income                         | 0.0203              |                     | LQ4_07   | Activity restriction: diabetes                       | 0.0193              |
| 15   |                     | LQ_4EQL  | EuroQoL: pain/discomfort                 | 0.0194              |                     | LQ4_09   | Activity restriction: back and neck problem          | 0.0183              |
| 16   |                     | BP5      | Depression for 2 weeks or more           | 0.0177              |                     | LQ_3EQL  | EuroQoL: daily activity                              | 0.0167              |
| 17   |                     | sex      | Sex of participant                       | 0.0163              |                     | LQ4_22   | Activity restriction: old age                        | 0.0165              |
| 18   |                     | LQ_5EQL  | EuroQoL: anxiety/depression              | 0.0158              |                     | BP8      | Average sleep time per day                           | 0.0161              |
| 19   |                     | DF2_lt   | Prevalence of depression                 | 0.0139              |                     | LQ4_05   | Activity restriction: breathing problem/lung disease | 0.0150              |
| 20   |                     | D_2_1    | Uncomfortable experience in past 2 weeks | 0.0136              |                     | BO1      | Subjective body type recognition                     | 0.0146              |
| 1    | BP6_10 <sup>1</sup> | age      | Age of participant                       | 0.1738              | BP6_31 <sup>2</sup> | age      | Age of participant                                   | 0.2402              |
| 2    |                     | ainc     | Average monthly income                   | 0.1574              |                     | ainc     | Average monthly income                               | 0.1561              |
| 3    |                     | BD2      | Drinking age                             | 0.1123              |                     | BD2      | Drinking age                                         | 0.1190              |
| 4    |                     | LQ_VAS   | EuroQoL: total score                     | 0.0920              |                     | LQ_VAS   | EuroQoL: total score                                 | 0.0564              |
| 5    |                     | BP8      | Average sleep time per day               | 0.0565              |                     | BP8      | Average sleep time per day                           | 0.0372              |
| 6    |                     | educ     | Education level                          | 0.0462              |                     | BO1_1    | Weight change in past 1 year                         | 0.0348              |
| 7    |                     | BO1      | Subjective body type recognition         | 0.0378              |                     | BO1      | Subjective body type recognition                     | 0.0330              |
| 8    |                     | D_1_1    | Subjective health status                 | 0.0373              |                     | incm     | Personal income                                      | 0.0317              |
| 9    |                     | BO1_1    | Weight change in past 1 year             | 0.0280              |                     | educ     | Education level                                      | 0.0265              |
| 10   |                     | incm     | Personal income                          | 0.0278              |                     | sex      | Sex of participant                                   | 0.0230              |
| 11   |                     | BP1      | Awareness of usual stress                | 0.0272              |                     | EC1_1    | Economic activity                                    | 0.0203              |
| 12   |                     | EC1_1    | Economic activity                        | 0.0231              |                     | LQ_5EQL  | EuroQoL: anxiety/depression                          | 0.0174              |

|    |         |                                             |        |         |                                |        |
|----|---------|---------------------------------------------|--------|---------|--------------------------------|--------|
| 13 | house   | Home ownership                              | 0.0226 | D_1_1   | Subjective health status       | 0.0172 |
| 14 | ho_incm | Household income                            | 0.0186 | LQ_4EQL | EuroQoL: pain/discomfort       | 0.0171 |
| 15 | LQ_4EQL | EuroQoL: pain/discomfort                    | 0.0183 | BP1     | Awareness of usual stress      | 0.0166 |
| 16 | D_2_1   | Uncomfortable experience<br>in past 2 weeks | 0.0160 | ho_incm | Household income               | 0.0153 |
| 17 | sex     | Sex of participant                          | 0.0149 | BP5     | Depression for 2 weeks or more | 0.0142 |
| 18 | BP5     | Depression for 2 weeks or more              | 0.0130 | house   | Home ownership                 | 0.0125 |
| 19 | LQ_5EQL | EuroQoL: anxiety/depression                 | 0.0110 | DF2_lt  | Prevalence of depression       | 0.0114 |
| 20 | DF2_lt  | Prevalence of depression                    | 0.0099 | LQ4_10  | Activity restriction: cancer   | 0.0111 |

<sup>1</sup>BP6\_10: suicide ideation in the last year; <sup>2</sup>BP6\_31: suicide attempts in the last year.

**Table S2:** Important features and risk variable score in yearly dataset condition (2012 and 2013).

| Rank | DV                  | Variable | Variable<br>description                     | Risk<br>variable<br>score | DV                  | Variable | Variable<br>description                     | Risk<br>variable<br>score |
|------|---------------------|----------|---------------------------------------------|---------------------------|---------------------|----------|---------------------------------------------|---------------------------|
| 1    | BP6_10 <sup>1</sup> | ainc     | Average monthly income                      | 0.2253                    | BP6_31 <sup>2</sup> | age      | Age of participant                          | 0.2485                    |
| 2    |                     | age      | Age of participant                          | 0.1511                    |                     | ainc     | Average monthly income                      | 0.2374                    |
| 3    |                     | LQ_VAS   | EuroQoL: total score                        | 0.1138                    |                     | LQ_VAS   | EuroQoL: total score                        | 0.1522                    |
| 4    |                     | BD2      | Drinking age                                | 0.0920                    |                     | BD2      | Drinking age                                | 0.0809                    |
| 5    |                     | BP8      | Average sleep time per day                  | 0.0508                    |                     | BP8      | Average sleep time per day                  | 0.0333                    |
| 6    |                     | educ     | Education level                             | 0.0385                    |                     | educ     | Education level                             | 0.0277                    |
| 7    |                     | BO1      | Subjective body type recognition            | 0.0370                    |                     | BP5      | Depression for 2 weeks<br>or more           | 0.0188                    |
| 8    |                     | D_1_1    | Subjective health status                    | 0.0309                    |                     | D_1_1    | Subjective health status                    | 0.0169                    |
| 9    |                     | incm     | Personal income                             | 0.0251                    |                     | D_2_1    | Uncomfortable experience<br>in past 2 weeks | 0.0158                    |
| 10   |                     | BO1_1    | Weight change in past 1 year                | 0.0224                    |                     | ho_incm  | Household income                            | 0.0155                    |
| 11   |                     | BP1      | Awareness of usual stress                   | 0.0224                    |                     | BO1      | Subjective body type recognition            | 0.0138                    |
| 12   |                     | sex      | Sex of participant                          | 0.0207                    |                     | house    | Home ownership                              | 0.0130                    |
| 13   |                     | house    | Home ownership                              | 0.0195                    |                     | incm     | Personal income                             | 0.0130                    |
| 14   |                     | EC1_1    | Economic activity                           | 0.0188                    |                     | BP1      | Awareness of usual stress                   | 0.0128                    |
| 15   |                     | ho_incm  | Household income                            | 0.0165                    |                     | LQ_2EQL  | EuroQoL: self care                          | 0.0124                    |
| 16   |                     | LQ_4EQL  | EuroQoL: pain/discomfort                    | 0.0160                    |                     | BO1_1    | Weight change in past 1 year                | 0.0106                    |
| 17   |                     | BP5      | Depression for 2 weeks<br>or more           | 0.0136                    |                     | DF2_lt   | Prevalence of depression                    | 0.0094                    |
| 18   |                     | LQ_1EQL  | EuroQoL: athletic ability                   | 0.0125                    |                     | LQ_4EQL  | EuroQoL: pain/discomfort                    | 0.0092                    |
| 19   |                     | D_2_1    | Uncomfortable experience<br>in past 2 weeks | 0.0121                    |                     | LQ_1EQL  | EuroQoL: athletic ability                   | 0.0078                    |
| 20   |                     | DF2_lt   | Prevalence of depression                    | 0.0107                    |                     | LQ_5EQL  | EuroQoL: anxiety/depression                 | 0.0072                    |
| 1    | BP6_10 <sup>1</sup> | ainc     | Average monthly income                      | 0.2397                    | BP6_31 <sup>2</sup> | ainc     | Average monthly income                      | 0.3279                    |
| 2    |                     | age      | Age of participant                          | 0.1854                    |                     | age      | Age of participant                          | 0.1689                    |

|    |         |                                             |        |         |                                                         |        |
|----|---------|---------------------------------------------|--------|---------|---------------------------------------------------------|--------|
| 3  | BD2     | Drinking age                                | 0.1069 | BD2     | Drinking age                                            | 0.1292 |
| 4  | BP8     | Average sleep time per day                  | 0.0531 | BP8     | Average sleep time per day                              | 0.0399 |
| 5  | BO1     | Subjective body type recognition            | 0.0384 | BO1_1   | Weight change in past 1 year                            | 0.0340 |
| 6  | educ    | Education level                             | 0.0367 | D_1_1   | Subjective health status                                | 0.0279 |
| 7  | BO1_1   | Weight change in past 1 year                | 0.0354 | LQ_5EQL | EuroQoL: anxiety/depression                             | 0.0264 |
| 8  | BP1     | Awareness of usual stress                   | 0.0303 | BO1     | Subjective body type recognition                        | 0.0247 |
| 9  | D_1_1   | Subjective health status                    | 0.0268 | educ    | Education level                                         | 0.0245 |
| 10 | LQ_4EQL | EuroQoL: pain/discomfort                    | 0.0265 | incm    | Personal income                                         | 0.0205 |
| 11 | house   | Home ownership                              | 0.0261 | BP5     | Depression for 2 weeks<br>or more                       | 0.0204 |
| 12 | LQ_5EQL | EuroQoL: anxiety/depression                 | 0.0198 | BP1     | Awareness of usual stress                               | 0.0192 |
| 13 | EC1_1   | Economic activity                           | 0.0189 | LQ_4EQL | EuroQoL: pain/discomfort                                | 0.0187 |
| 14 | incm    | Personal income                             | 0.0183 | house   | Home ownership                                          | 0.0181 |
| 15 | BP5     | Depression for 2 weeks<br>or more           | 0.0177 | sex     | Sex of participant                                      | 0.0143 |
| 16 | ho_incm | Household income                            | 0.0155 | BP5     | Depression for 2 weeks<br>or more                       | 0.0116 |
| 17 | D_2_1   | Uncomfortable experience<br>in past 2 weeks | 0.0143 | incm    | Personal income                                         | 0.0094 |
| 18 | LQ_3EQL | EuroQoL: daily activity                     | 0.0143 | LQ1_sb  | Lying in a sickbed in past 1 month                      | 0.0083 |
| 19 | DF2_lt  | Prevalence of depression                    | 0.0111 | LQ_4EQL | EuroQoL: pain/discomfort                                | 0.0082 |
| 20 | LQ_1EQL | EuroQoL: athletic ability                   | 0.0094 | LQ4_05  | Activity restriction: breathing<br>problem/lung disease | 0.0077 |

<sup>1</sup>BP6\_10: suicide ideation in the last year; <sup>2</sup>BP6\_31: suicide attempts in the last year.

**Table S3:** Important features and risk variable score in yearly dataset condition (2014 and 2015).

| Rank | DV                  | Variable | Variable<br>description          | Risk<br>variable<br>score | DV                  | Variable | Variable<br>description          | Risk<br>variable<br>score |
|------|---------------------|----------|----------------------------------|---------------------------|---------------------|----------|----------------------------------|---------------------------|
| 1    | BP6_10 <sup>1</sup> | ainc     | Average monthly income           | 0.5317                    | BP6_31 <sup>2</sup> | ainc     | Average monthly income           | 0.1669                    |
| 2    |                     | D_1_1    | Subjective health status         | 0.0788                    |                     | BP8      | Average sleep time per day       | 0.0744                    |
| 3    |                     | ho_incm  | Household income                 | 0.0545                    |                     | BD2      | Drinking age                     | 0.0115                    |
| 4    |                     | BD2      | Drinking age                     | 0.0520                    |                     | age      | Age of participant               | 0.0110                    |
| 5    |                     | age      | Age of participant               | 0.0429                    |                     | ho_incm  | Household income                 | 0.0095                    |
| 6    |                     | BP8      | Average sleep time per day       | 0.0421                    |                     | D_1_1    | Subjective health status         | 0.0082                    |
| 7    |                     | BP1      | Awareness of usual stress        | 0.0361                    |                     | incm     | Personal income                  | 0.0078                    |
| 8    |                     | BO1      | Subjective body type recognition | 0.0358                    |                     | BO1      | Subjective body type recognition | 0.0073                    |
| 9    |                     | BD1      | Lifetime drinking experience     | 0.0285                    |                     | BD1      | Lifetime drinking experience     | 0.0068                    |
| 10   |                     | sex      | Sex of participant               | 0.0278                    |                     | educ     | Education level                  | 0.0063                    |
| 11   |                     | incm     | Personal income                  | 0.0198                    |                     | BP5      | Depression for 2 weeks or more   | 0.0057                    |
| 12   |                     | BP5      | Depression for 2 weeks or more   | 0.0108                    |                     | house    | Home ownership                   | 0.0056                    |

|    |                     |         |                                                         |        |                     |         |                                                         |        |
|----|---------------------|---------|---------------------------------------------------------|--------|---------------------|---------|---------------------------------------------------------|--------|
| 13 |                     | house   | Home ownership                                          | 0.0105 |                     | sex     | Sex of participant                                      | 0.0047 |
| 14 |                     | educ    | Education level                                         | 0.0099 |                     | BP1     | Awareness of usual stress                               | 0.0040 |
| 15 |                     | D_2_1   | Uncomfortable experience in past<br>2 weeks             | 0.0032 |                     | EC1_1   | Economic activity                                       | 0.0022 |
| 16 |                     | allownc | Whether or not receiving basic<br>livelihood            | 0.0015 |                     | BP7     | Whether counseling for mental<br>problem in past 1 year | 0.0014 |
| 17 |                     | EC1_1   | Economic activity                                       | 0.0011 |                     | LQ1_sb  | Lying in a sickbed in past 1 month                      | 0.0009 |
| 18 |                     | BP7     | Whether counseling for mental<br>problem in past 1 year | 0.0009 |                     | D_2_1   | Uncomfortable experience in past 2<br>weeks             | 0.0007 |
| 19 |                     | LQ1_sb  | Lying in a sickbed in past 1<br>month                   | 0.0004 |                     | allownc | Whether or not to receive basic<br>livelihood           | 0.0003 |
| 20 |                     | LQ4_16  | Activity restriction: mental<br>retardation             | 0.0003 |                     | LQ4_00  | Whether activity is restricted                          | 0.0001 |
| 1  | BP6_10 <sup>1</sup> | ainc    | Average monthly income                                  | 0.2373 | BP6_31 <sup>2</sup> | ainc    | Average monthly income                                  | 0.2662 |
| 2  |                     | age     | Age of participant                                      | 0.1696 |                     | age     | Age of participant                                      | 0.2111 |
| 3  |                     | BD2     | Drinking age                                            | 0.1249 |                     | BD2     | Drinking age                                            | 0.1273 |
| 4  |                     | BP8     | Average sleep time per day                              | 0.0572 |                     | BP8     | Average sleep time per day                              | 0.0367 |
| 5  |                     | educ    | Education level                                         | 0.0465 |                     | BO1_1   | Weight change in past 1 year                            | 0.0252 |
| 6  |                     | BO1     | Subjective body type recognition                        | 0.0392 |                     | D_1_1   | Subjective health status                                | 0.0247 |
| 7  |                     | BO1_1   | Weight change in past 1 year                            | 0.0309 |                     | educ    | Education level                                         | 0.0244 |
| 8  |                     | BP1     | Awareness of usual stress                               | 0.0304 |                     | BO1     | Subjective body type recognition                        | 0.0217 |
| 9  |                     | D_1_1   | Subjective health status                                | 0.0271 |                     | LQ_2EQL | EuroQoL: self care                                      | 0.0210 |
| 10 |                     | EC1_1   | Economic activity                                       | 0.0232 |                     | LQ_4EQL | EuroQoL: pain/discomfort                                | 0.0208 |
| 11 |                     | incm    | Personal income                                         | 0.0231 |                     | LQ_5EQL | EuroQoL: anxiety/depression                             | 0.0207 |
| 12 |                     | sex     | Sex of participant                                      | 0.0222 |                     | LQ_3EQL | EuroQoL: daily activity                                 | 0.0197 |
| 13 |                     | BP5     | Depression for 2 weeks or more                          | 0.0212 |                     | ho_incm | Household income                                        | 0.0185 |
| 14 |                     | LQ_4EQL | EuroQoL: pain/discomfort                                | 0.0170 |                     | BP7     | Whether counseling for mental<br>problem in past 1 year | 0.0180 |
| 15 |                     | house   | Home ownership                                          | 0.0165 |                     | BP5     | Depression for 2 weeks or more                          | 0.0177 |
| 16 |                     | LQ_5EQL | EuroQoL: anxiety/depression                             | 0.0160 |                     | BP1     | Awareness of usual stress                               | 0.0173 |
| 17 |                     | ho_incm | Household income                                        | 0.0111 |                     | EC1_1   | Economic activity                                       | 0.0170 |
| 18 |                     | LQ_1EQL | EuroQoL: athletic ability                               | 0.0097 |                     | LQ_1EQL | EuroQoL: athletic ability                               | 0.0170 |
| 19 |                     | LQ_3EQL | EuroQoL: daily activity                                 | 0.0092 |                     | incm    | Personal income                                         | 0.0169 |
| 20 |                     | D_2_1   | Uncomfortable experience in past<br>2 weeks             | 0.0091 |                     | sex     | Sex of participant                                      | 0.0146 |

<sup>1</sup>BP6\_10: suicide ideation in the last year; <sup>2</sup>BP6\_31: suicide attempts in the last year.

**Table S4:** Important features and risk variable score in yearly dataset condition (2016 and 2017).

| Rank | DV | Variable | Variable description | Risk variable score | DV | Variable | Variable description | Risk variable score |
|------|----|----------|----------------------|---------------------|----|----------|----------------------|---------------------|
|------|----|----------|----------------------|---------------------|----|----------|----------------------|---------------------|

|    |                     |         |                                                      |        |                     |         |                                                      |        |
|----|---------------------|---------|------------------------------------------------------|--------|---------------------|---------|------------------------------------------------------|--------|
| 1  | BP6_10 <sup>1</sup> | ainc    | Average monthly income                               | 0.6288 | BP6_31 <sup>2</sup> | ainc    | Average monthly income                               | 0.3126 |
| 2  |                     | BP8     | Average sleep time per day                           | 0.1163 |                     | age     | Age of participant                                   | 0.2167 |
| 3  |                     | incm    | Personal income                                      | 0.0457 |                     | BP8     | Average sleep time per day                           | 0.1178 |
| 4  |                     | age     | Age of participant                                   | 0.0321 |                     | BD2     | Drinking age                                         | 0.0985 |
| 5  |                     | BP5     | Depression for 2 weeks or more                       | 0.0312 |                     | educ    | Education level                                      | 0.0272 |
| 6  |                     | BD2     | Drinking age                                         | 0.0227 |                     | D_1_1   | Subjective health status                             | 0.0236 |
| 7  |                     | D_1_1   | Subjective health status                             | 0.0210 |                     | BO1_1   | Weight change in past 1 year                         | 0.0227 |
| 8  |                     | sex     | Sex of participant                                   | 0.0173 |                     | BO1     | Subjective body type recognition                     | 0.0191 |
| 9  |                     | house   | Home ownership                                       | 0.0142 |                     | BP1     | Awareness of usual stress                            | 0.0189 |
| 10 |                     | educ    | Education level                                      | 0.0130 |                     | sex     | Sex of participant                                   | 0.0156 |
| 11 |                     | EC1_1   | Economic activity                                    | 0.0114 |                     | LQ_4EQL | EuroQoL: pain/discomfort                             | 0.0143 |
| 12 |                     | BP1     | Awareness of usual stress                            | 0.0094 |                     | incm    | Personal income                                      | 0.0112 |
| 13 |                     | ho_incm | Household income                                     | 0.0089 |                     | LQ_3EQL | EuroQoL: daily activity                              | 0.0108 |
| 14 |                     | BO1     | Subjective body type recognition                     | 0.0059 |                     | LQ_2EQL | EuroQoL: self care                                   | 0.0088 |
| 15 |                     | BD1     | Lifetime drinking experience                         | 0.0048 |                     | BP7     | Whether counseling for mental problem in past 1 year | 0.0087 |
| 16 |                     | LQ1_sb  | Lying in a sickbed in past 1 month                   | 0.0033 |                     | LQ_5EQL | EuroQoL: anxiety/depression                          | 0.0084 |
| 17 |                     | D_2_1   | Uncomfortable experience in past 2 weeks             | 0.0026 |                     | EC1_1   | Economic activity                                    | 0.0083 |
| 18 |                     | BP7     | Whether counseling for mental problem in past 1 year | 0.0021 |                     | LQ_1EQL | EuroQoL: athletic ability                            | 0.0082 |
| 19 |                     | allownc | Whether or not receiving basic livelihood            | 0.0004 |                     | house   | Home ownership                                       | 0.0080 |
| 20 |                     | LQ4_10  | Activity restriction: cancer                         | 0.0016 |                     | D_2_1   | Uncomfortable experience in past 2 weeks             | 0.0072 |
| 1  | BP6_10 <sup>1</sup> | ainc    | Average monthly income                               | 0.2332 | BP6_31 <sup>2</sup> | ainc    | Average monthly income                               | 0.2966 |
| 2  |                     | age     | Age of participant                                   | 0.1562 |                     | age     | Age of participant                                   | 0.2044 |
| 3  |                     | BP8     | Average sleep time per day                           | 0.1164 |                     | BD2     | Drinking age                                         | 0.1289 |
| 4  |                     | BD2     | Drinking age                                         | 0.1117 |                     | BP8     | Average sleep time per day                           | 0.0880 |
| 5  |                     | educ    | Education level                                      | 0.0451 |                     | BP1     | Awareness of usual stress                            | 0.0282 |
| 6  |                     | BO1     | Subjective body type recognition                     | 0.0355 |                     | LQ_5EQL | EuroQoL: anxiety/depression                          | 0.0235 |
| 7  |                     | BO1_1   | Weight change in past 1 year                         | 0.0338 |                     | BP5     | Depression for 2 weeks or more                       | 0.0221 |
| 8  |                     | D_1_1   | Subjective health status                             | 0.0239 |                     | D_1_1   | Subjective health status                             | 0.0201 |
| 9  |                     | BP5     | Depression for 2 weeks or more                       | 0.0226 |                     | LQ_4EQL | EuroQoL: pain/discomfort                             | 0.0176 |
| 10 |                     | BP1     | Awareness of usual stress                            | 0.0217 |                     | BO1_1   | Weight change in past 1 year                         | 0.0173 |
| 11 |                     | incm    | Personal income                                      | 0.0209 |                     | educ    | Education level                                      | 0.0167 |
| 12 |                     | LQ_4EQL | EuroQoL: pain/discomfort                             | 0.0198 |                     | LQ_1EQL | EuroQoL: athletic ability                            | 0.0167 |
| 13 |                     | house   | Home ownership                                       | 0.0191 |                     | sex     | Sex of participant                                   | 0.0149 |
| 14 |                     | EC1_1   | Economic activity                                    | 0.0176 |                     | incm    | Personal income                                      | 0.0141 |
| 15 |                     | LQ_5EQL | EuroQoL: anxiety/depression                          | 0.0170 |                     | house   | Home ownership                                       | 0.0131 |
| 16 |                     | sex     | Sex of participant                                   | 0.0139 |                     | BP7     | Whether counseling for mental problem in past 1 year | 0.0123 |

|    |         |                                          |        |         |                                          |        |
|----|---------|------------------------------------------|--------|---------|------------------------------------------|--------|
| 17 | D_2_1   | Uncomfortable experience in past 2 weeks | 0.0128 | LQ4_16  | Activity restriction: mental retardation | 0.0106 |
| 18 | ho_incm | Household income                         | 0.0127 | BO1     | Subjective body type recognition         | 0.0105 |
| 19 | LQ_1EQL | EuroQoL: athletic ability                | 0.0104 | D_2_1   | Uncomfortable experience in past 2 weeks | 0.0077 |
| 20 | LQ_3EQL | EuroQoL: daily activity                  | 0.0069 | ho_incm | Household income                         | 0.0071 |

<sup>1</sup>BP6\_10: suicide ideation in the last year; <sup>2</sup>BP6\_31: suicide attempts in the last year.

**Table S5:** Important features and risk variable score in yearly dataset condition (2018 and 2019).

| Rank | DV                  | Variable | Variable description                                 | Risk variable score | DV                  | Variable | Variable description                                 | Risk variable score |
|------|---------------------|----------|------------------------------------------------------|---------------------|---------------------|----------|------------------------------------------------------|---------------------|
| 1    | BP6_10 <sup>1</sup> | ainc     | Average monthly income                               | 0.4320              | BP6_31 <sup>2</sup> | ainc     | Average monthly income                               | 0.3252              |
| 2    |                     | BP8      | Average sleep time per day                           | 0.2797              |                     | age      | Age of participant                                   | 0.1669              |
| 3    |                     | ho_incm  | Household income                                     | 0.0428              |                     | BP8      | Average sleep time per day                           | 0.1391              |
| 4    |                     | age      | Age of participant                                   | 0.0361              |                     | BD2      | Drinking age                                         | 0.1239              |
| 5    |                     | BD2      | Drinking age                                         | 0.0337              |                     | educ     | Education level                                      | 0.0357              |
| 6    |                     | BO1      | Subjective body type recognition                     | 0.0248              |                     | BO1_1    | Weight change in past 1 year                         | 0.0211              |
| 7    |                     | educ     | Education level                                      | 0.0246              |                     | BO1      | Subjective body type recognition                     | 0.0192              |
| 8    |                     | BD1      | Lifetime drinking experience                         | 0.0175              |                     | ho_incm  | Household income                                     | 0.0184              |
| 9    |                     | BP1      | Awareness of usual stress                            | 0.0161              |                     | EC1_1    | Economic activity                                    | 0.0181              |
| 10   |                     | D_1_1    | Subjective health status                             | 0.0152              |                     | incm     | Personal income                                      | 0.0180              |
| 11   |                     | incm     | Personal income                                      | 0.0106              |                     | BP1      | Awareness of usual stress                            | 0.0159              |
| 12   |                     | sex      | Sex of participant                                   | 0.0101              |                     | D_1_1    | Subjective health status                             | 0.0146              |
| 13   |                     | BP5      | Depression for 2 weeks or more                       | 0.0078              |                     | LQ_4EQL  | EuroQoL: pain/discomfort                             | 0.0131              |
| 14   |                     | house    | Home ownership                                       | 0.0059              |                     | house    | Home ownership                                       | 0.0127              |
| 15   |                     | BP7      | Whether counseling for mental problem in past 1 year | 0.0052              |                     | LQ_1EQL  | EuroQoL: athletic ability                            | 0.0073              |
| 16   |                     | D_2_1    | Uncomfortable experience in past 2 weeks             | 0.0009              |                     | LQ_5EQL  | EuroQoL: anxiety/depression                          | 0.0071              |
| 17   |                     | LQ1_sb   | Lying in a sickbed in past 1 month                   | 0.0006              |                     | D_2_1    | Uncomfortable experience in past 2 weeks             | 0.0071              |
| 18   |                     | EC1_1    | Economic activity                                    | 0.0003              |                     | DF2_It   | Prevalence of depression                             | 0.0057              |
| 19   |                     | allownc  | Whether or not receiving basic livelihood            | 0.0002              |                     | LQ_3EQL  | EuroQoL: daily activity                              | 0.0048              |
| 20   |                     | LQ4_04   | Activity restriction: heart disease                  | 0.0015              |                     | BP7      | Whether counseling for mental problem in past 1 year | 0.0034              |
| 1    | BP6_10 <sup>1</sup> | ainc     | Average monthly income                               | 0.2568              | BP6_31 <sup>2</sup> | ainc     | Average monthly income                               | 0.2931              |
| 2    |                     | age      | Age of participant                                   | 0.1697              |                     | age      | Age of participant                                   | 0.1794              |
| 3    |                     | BD2      | Drinking age                                         | 0.1091              |                     | BD2      | Drinking age                                         | 0.1485              |
| 4    |                     | BP8      | Average sleep time per day                           | 0.0679              |                     | BP8      | Average sleep time per day                           | 0.0642              |

|    |         |                                  |        |         |                                          |        |
|----|---------|----------------------------------|--------|---------|------------------------------------------|--------|
| 5  | educ    | Education level                  | 0.0448 | BO1     | Subjective body type recognition         | 0.0254 |
| 6  | BO1     | Subjective body type recognition | 0.0391 | incm    | Personal income                          | 0.0250 |
| 7  | BO1_1   | Weight change in past 1 year     | 0.0288 | BP5     | Depression for 2 weeks or more           | 0.0230 |
| 8  | D_1_1   | Subjective health status         | 0.0254 | LQ_1EQL | EuroQoL: athletic ability                | 0.0229 |
| 9  | house   | Home ownership                   | 0.0253 | educ    | Education level                          | 0.0228 |
| 10 | BP1     | Awareness of usual stress        | 0.0250 | LQ_2EQL | EuroQoL: self care                       | 0.0221 |
| 11 | incm    | Personal income                  | 0.0232 | BO1_1   | Weight change in past 1 year             | 0.0186 |
| 12 | EC1_1   | Economic activity                | 0.0214 | BD1     | Lifetime drinking experience             | 0.0180 |
| 13 | LQ_4EQL | EuroQoL: pain/discomfort         | 0.0208 | D_1_1   | Subjective health status                 | 0.0148 |
| 14 | BP5     | Depression for 2 weeks or more   | 0.0206 | LQ_5EQL | EuroQoL: anxiety/depression              | 0.0135 |
| 15 | LQ_2EQL | EuroQoL: self care               | 0.0199 | house   | Home ownership                           | 0.0131 |
| 16 | sex     | Sex of participant               | 0.0192 | LQ_3EQL | EuroQoL: daily activity                  | 0.0114 |
| 17 | LQ_3EQL | EuroQoL: daily activity          | 0.0141 | D_2_1   | Uncomfortable experience in past 2 weeks | 0.0106 |
| 18 | LQ_1EQL | EuroQoL: athletic ability        | 0.0135 | BP1     | Awareness of usual stress                | 0.0101 |
| 19 | LQ_5EQL | EuroQoL: anxiety/depression      | 0.0128 | LQ_4EQL | EuroQoL: pain/discomfort                 | 0.0091 |
| 20 | ho_incm | Household income                 | 0.0120 | sex     | Sex of participant                       | 0.0089 |

---

<sup>1</sup>BP6\_10: suicide ideation in the last year; <sup>2</sup>BP6\_31: suicide attempts in the last year
